# Supplementary material for: Extraction behaviors of aqueous PEG impregnated resin system in terms of impregnation stability and recovery via protein impregnated resin interactions on bovine serum albumin
Source: PeerJ. 2021 Dec 6;9:e11920. doi: 10.7717/peerj.11920 (PMC8656375; doi:10.7717/peerj.11920)
Supplement: Supplemental Information 1 [file peerj-09-11920-s001.xlsx]

## Sheet: Patent Blue V stdd curve
			average	dilution factor
1.02	1.09	1.121	1.077	10.77	1
0.512	0.537	0.518	0.522333	5.22333	0.5
0.263	0.283	0.292	0.279333	2.79333	0.25
0.147	0.157	0.158	0.154	1.54	0.125
0.103	0.118	0.124	0.115	1.15	0.0625
0.068	0.087	0.095	0.0833333	0.833333	0.03125

## Sheet: imp stability
			OD620nm										Leaching percentage(%)
			Time (min)
	PEG mw	PEG conc	0	30	60	90	120	150	180	210	240	overnight
Amberlite XAD4	2000	10	0.085	0.081	0.064	0.104	0.088	0.06	0.059	0.058			0.789229	0.752089	0.594243	0.965645	0.817084	0.557103	0.547818
		20	0.05	0.064	0.051	0.061	0.06	0.062	0.053	0.048			0.464253	0.594243	0.473538	0.566388	0.557103	0.575673	0.492108
		30	0.056	0.083	0.071	0.068	0.079	0.092	0.054	0.066			0.519963	0.770659	0.659239	0.631383	0.733519	0.854225	0.501393
		40	0.061	0.087	0.062	0.068	0.082	0.091	0.058	0.064			0.566388	0.807799	0.575673	0.631383	0.761374	0.84494	0.538533
	4000	10	0.045	0.045	0.041	0.048	0.058	0.054	0.043	0.043			0.417827	0.417827	0.380687	0.445682	0.538533	0.501393	0.399257
		20	0.073	0.06	0.047	0.046	0.051	0.055	0.046	0.045			0.677809	0.557103	0.436397	0.427112	0.473538	0.510678	0.427112
		30	0.086	0.08	0.055	0.055	0.07	0.074	0.054	0.055			0.798514	0.742804	0.510678	0.510678	0.649954	0.687094	0.501393
		40	0.079	0.077	0.041	0.068	0.07	0.078	0.057	0.054			0.733519	0.714949	0.380687	0.631383	0.649954	0.724234	0.529248
	6000	10	0.05	0.049	0.044	0.058	0.057	0.052	0.046	0.042			0.464253	0.454968	0.408542	0.538533	0.529248	0.482823	0.427112
		20	0.059	0.066	0.051	0.064	0.068	0.062	0.048	0.049			0.547818	0.612813	0.473538	0.594243	0.631383	0.575673	0.445682
		30	0.089	0.08	0.06	0.083	0.075	0.082	0.062	0.053			0.82637	0.742804	0.557103	0.770659	0.696379	0.761374	0.575673
		40	0.08	0.084	0.064	0.089	0.081	0.094	0.061	0.054			0.742804	0.779944	0.594243	0.82637	0.752089	0.872795	0.566388
	8000	10	0.053	0.055	0.053	0.066	0.067	0.06	0.053	0.051			0.492108	0.510678	0.492108	0.612813	0.622098	0.557103	0.492108
		20	0.056	0.077	0.086	0.108	0.097	0.083	0.063	0.055			0.519963	0.714949	0.798514	1.00279	0.90065	0.770659	0.584958
		30	0.045	0.046	0.044	0.052	0.055	0.051	0.044	0.046			0.417827	0.427112	0.408542	0.482823	0.510678	0.473538	0.408542
		40	0.091	0.09	0.079	0.097	0.082	0.071	0.069	0.067			0.84494	0.835655	0.733519	0.90065	0.761374	0.659239	0.640669
VitraPor 4.0	2000	10	0.926	1.322	2.194	2.432	2.222	2.479	2.557				8.59796	12.2748	20.3714	22.5812	20.6314	23.0176	23.7419	0
		20	0.871	1.2	1.269	1.619	1.773	2.008	2.018				8.08728	11.1421	11.7827	15.0325	16.4624	18.6444	18.7372	0
		30	0.543	0.695	0.776	1.012	1.027	1.063	1.131				5.04178	6.45311	7.2052	9.39647	9.53575	9.87001	10.5014	0
		40	0.335	0.396	0.399	0.441	0.479	0.727	0.793				3.11049	3.67688	3.70474	4.09471	4.44754	6.75023	7.36305	0
	4000	10	0.548	0.668	0.692	0.878	0.895	0.91	0.971				5.08821	6.20241	6.42526	8.15227	8.31012	8.4494	9.01578	0
		20	0.46	0.537	0.549	0.566	0.577	0.61	0.615				4.27112	4.98607	5.09749	5.25534	5.35747	5.66388	5.71031	0
		30	0.306	0.391	0.393	0.395	0.395	0.464	0.473				2.84123	3.63045	3.64903	3.6676	3.6676	4.30826	4.39183	0
		40	0.26	0.273	0.285	0.3	0.321	0.327	0.347				2.41411	2.53482	2.64624	2.78552	2.9805	3.03621	3.22191	0
	6000	10	0.562	0.67	0.681	0.814	0.831	0.864	0.895				5.2182	6.22098	6.32312	7.55803	7.71588	8.02228	8.31012	0
		20	0.57	0.64	0.646	0.687	0.726	0.733	0.738				5.29248	5.94243	5.99814	6.37883	6.74095	6.80594	6.85237	0
		30	0.425	0.489	0.5	0.508	0.517	0.521	0.548				3.94615	4.54039	4.64253	4.71681	4.80037	4.83751	5.08821	0
		40	0.316	0.33	0.352	0.362	0.384	0.396	0.437				2.93408	3.06407	3.26834	3.36119	3.56546	3.67688	4.05757	0
	8000	10	0.549	0.562	0.618	0.692	0.695	0.71	0.718				5.09749	5.2182	5.73816	6.42526	6.45311	6.59239	6.66667	0
		20	0.366	0.432	0.45	0.459	0.473	0.502	0.508				3.39833	4.01114	4.17827	4.26184	4.39183	4.6611	4.71681	0
		30	0.281	0.334	0.36	0.364	0.378	0.38	0.398				2.6091	3.10121	3.34262	3.37976	3.50975	3.52832	3.69545	0
		40	0.195	0.256	0.258	0.266	0.267	0.267	0.285				1.81058	2.37697	2.39554	2.46982	2.47911	2.47911	2.64624	0
VitraPor 8.0	2000	10	0.225	2.18	2.206	2.189	2.169	2.15	2.174	2.126			2.08914	20.2414	20.4828	20.325	20.1393	19.9629	20.1857	19.74
		20	0.182	1.915	2.044	2.001	1.948	1.977	1.926	1.999			1.68988	17.7809	18.9786	18.5794	18.0873	18.3565	17.883	18.5608
		30	0.164	1.059	1.104	1.067	1.104	1.12	1.076	1.08			1.52275	9.83287	10.2507	9.90715	10.2507	10.3993	9.99071	10.0279
		40	0.103	0.728	0.75	0.653	0.731	0.756	0.761	0.763			0.95636	6.75952	6.96379	6.06314	6.78737	7.0195	7.06592	7.08449
	4000	10	0.129	1.092	1.118	1.091	1.145	1.095	1.124	1.098			1.19777	10.1393	10.3807	10.13	10.6314	10.1671	10.4364	10.195
		20	0.104	0.624	0.683	0.658	0.667	0.672	0.694	0.658			0.965645	5.79387	6.34169	6.10956	6.19313	6.23955	6.44383	6.10956
		30	0.114	0.441	0.503	0.483	0.516	0.51	0.544	0.487			1.0585	4.09471	4.67038	4.48468	4.79109	4.73538	5.05107	4.52182
		40	0.084	0.348	0.383383	0.361	0.408	0.383	0.402	0.37			0.779944	3.2312	3.55973	3.3519	3.7883	3.55617	3.73259	3.43547
	6000	10	0.09	0.908	0.946	0.938	0.948	0.936	0.968	0.93			0.835655	8.43083	8.78366	8.70938	8.80223	8.69081	8.98793	8.6351
		20	0.121	0.758	0.818	0.774	0.826	0.764	0.807	0.802			1.12349	7.03807	7.59517	7.18663	7.66945	7.09378	7.49304	7.44661
		30	0.092	0.518	0.581	0.566	0.598	0.595	0.594	0.57			0.854225	4.80966	5.39461	5.25534	5.55246	5.52461	5.51532	5.29248
		40	0.103	0.398	0.432	0.401	0.459	0.413	0.46	0.433			0.95636	3.69545	4.01114	3.72331	4.26184	3.83473	4.27112	4.02043
	8000	10	0.137	0.788	0.825	0.762	0.834	0.809	0.849	0.811			1.27205	7.31662	7.66017	7.07521	7.74373	7.51161	7.88301	7.53018
		20	0.116	0.479	0.562	0.528	0.544	0.511	0.544	0.683			1.07707	4.44754	5.2182	4.90251	5.05107	4.74466	5.05107	6.34169
		30	0.098	0.342	0.415	0.373	0.401	0.394	0.429	0.392			0.909935	3.17549	3.8533	3.46332	3.72331	3.65831	3.98329	3.63974
		40	0.1	0.274	0.335	0.301	0.337	0.285	0.334	0.299			0.928505	2.5441	3.11049	2.7948	3.12906	2.64624	3.10121	2.77623

## Sheet: maximum adsorption
time (min)				BSA concentration (mg/mL)
	1.0 mg/mL				0.5 mg/mL					1.5mg/mL					2.0 mg/mL
0	1.408	1.4	1.0085	0.580151	0.865	0.852	0.85	0.517667	0.294451	1.166	1.148	1.16	1.90625	1.10271	1.597	1.424	1.221	3.2592	1.89022
30	1.336	1.362	0.9535	0.548137	0.847	0.836	0.854	0.507667	0.28863	1.153	1.139	1.144	1.87458	1.08427	1.229	1.234	1.215	2.90675	1.68507
60	1.313	1.336	0.929	0.533877	0.833	0.824	0.841	0.494667	0.281063	1.15	1.136	1.128	1.85625	1.0736	1.209	1.198	1.201	2.82508	1.63753
90	1.299	1.327	0.9175	0.527183	0.827	0.819	0.833	0.488333	0.277377	1.133	1.108	1.124	1.81542	1.04984	1.208	1.19	1.161	2.76792	1.60426
120	1.281	1.306	0.898	0.515832	0.824	0.818	0.826	0.484667	0.275243	1.118	1.098	1.12	1.79125	1.03577	1.198	1.164	1.159	2.72358	1.57845
150	1.267	1.295	0.8855	0.508556	0.807	0.814	0.825	0.477333	0.270974	1.112	1.098	1.115	1.78208	1.03043	1.155	1.147	1.135	2.62558	1.52141
180	1.266	1.278	0.8765	0.503318	0.802	0.806	0.818	0.470667	0.267094	1.087	1.068	1.013	1.65125	0.954278	1.152	1.142	1.1	2.57542	1.49221
210	1.253	1.266	0.864	0.496042	0.796	0.798	0.814	0.464667	0.263601	1.064	1.056	1.008	1.61792	0.934876	1.139	1.108	1.041	2.45175	1.42023
240	1.249	1.238	0.848	0.486729	0.795	0.788	0.804	0.457667	0.259527	0.973	0.998	1.004	1.49042	0.860662	1.117	1.104	1.026	2.40392	1.39238
270	1.247	1.232	0.844	0.4844	0.769	0.768	0.776	0.433	0.245169	0.893	0.994	0.985	1.40458	0.8107	1.088	1.095	1.023	2.35608	1.36454
300	1.243	1.232	0.842	0.483236	0.771	0.769	0.766	0.430667	0.243811	0.877	0.904	0.916	1.25875	0.725815	1.027	1.034	1.013	2.20208	1.2749
330	1.245	1.231	0.8425	0.483527
blank	0.3955
	0.5	1	1.5	2	Ci
0	0	0	0	0	0
1	0.205549	0.419849	0.397293	0.109779	0
30	0.21137	0.451863	0.415726	0.31493	0
60	0.218937	0.466123	0.426397	0.362466	0
90	0.222623	0.472817	0.450165	0.395741	0														0	1.408	1.404	0.004
120	0.224757	0.484168	0.464232	0.421546	0															1.4
150	0.229026	0.491444	0.469567	0.478589	0														30	1.336	1.349	0.013
180	0.232906	0.496682	0.545722	0.50779	0															1.362
210	0.236399	0.503958	0.565124	0.579773	0														60	1.313	1.3245	0.0115
240	0.240473	0.513271	0.639338	0.607615	0															1.336
270	0.254831	0.5156	0.6893	0.635458	0														90	1.299	1.313	0.014
300	0.256189	0.516764	0.774185	0.725097	0															1.327
																			120	1.281	1.2935	0.0125
																				1.306
	0.270974	0.508556	1.03043	1.52141	Ceq														150	1.267	1.281	0.014
	0.76342	1.63815	1.56522	1.5953	qeq															1.295
	0.354947	0.310447	0.658329	0.953684	Ceq/qeq														180	1.266	1.272	0.006
	-0.567072	-0.293661	0.0130196	0.182246	log Ceq															1.278
	-0.117236	0.214352	0.194577	0.202842	log qeq														210	1.253	1.2595	0.0065
																				1.266
	log Qe q = n log C eq + log Kf																		240	1.249	1.2435	0.0055
																				1.238
n	1.4619	1.19																	270	1.247	1.2395	0.0075
Kf	6.28	3.61																		1.232
																			300	1.243	1.2375	0.0055
adsorption capacity of XAD4, K f is 6.28 mg/g and adsorption intensity																				1.232
constant, n is 1.46																			330	1.245	1.238	0.007
																				1.231
Qmax	-3.86997	-9.65251
Kb	-1.40325	-3.65637
